# Supplementary material for: Integrative analysis associates monocytes with insufficient erythropoiesis during acute Plasmodium cynomolgi malaria in rhesus macaques
Source: Springer Nature journal article supplement (doi:10.1186/s12936-017-2029-z), 2017-09-22

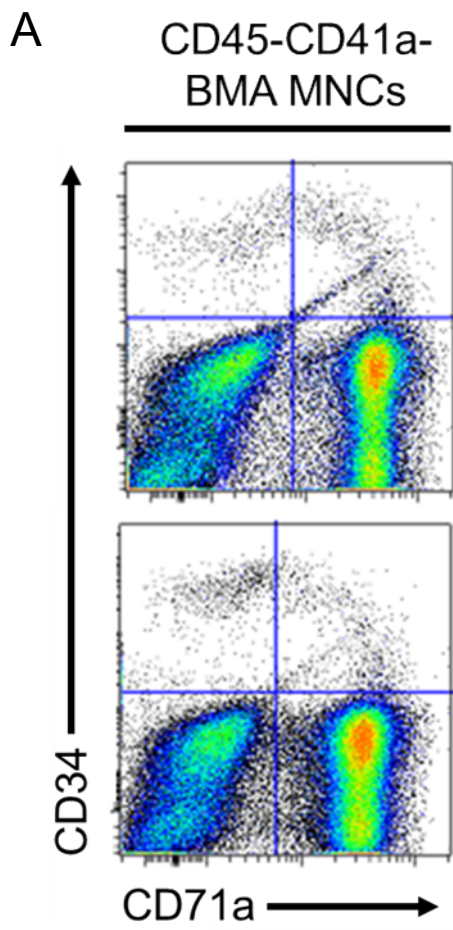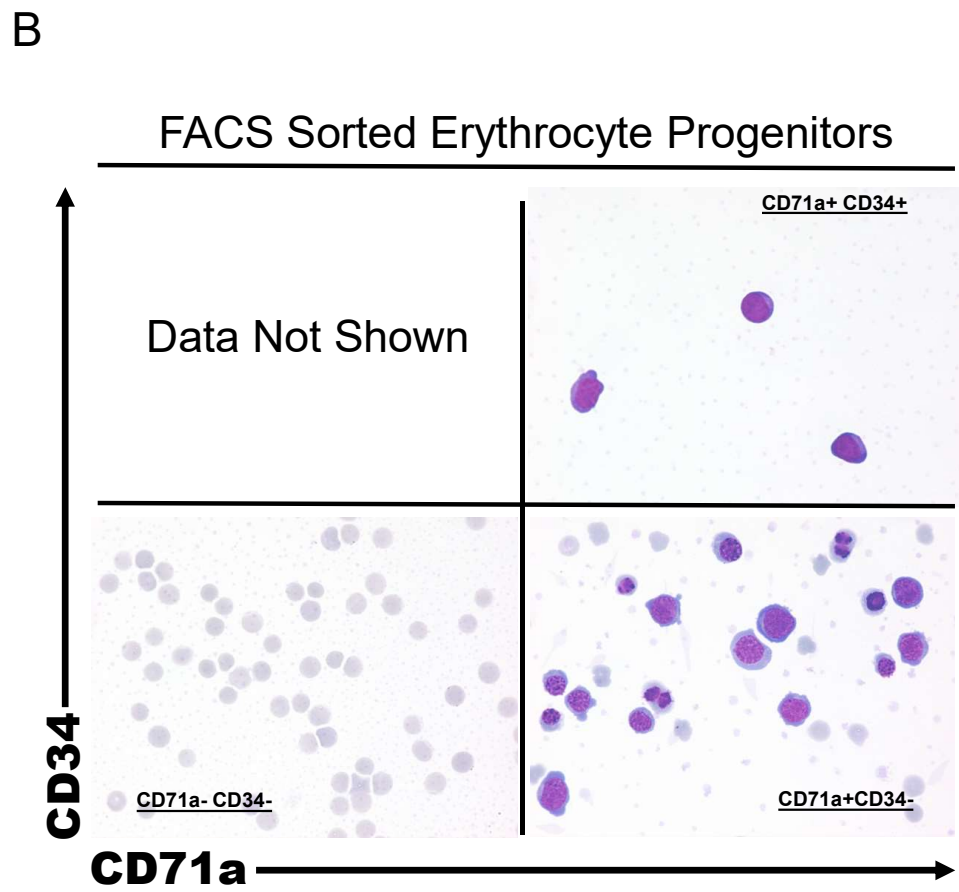

Supplement: MOESM8 [file 15081270]
